# Supplementary material for: Population Genetics as a Tool to Select Tsetse Control Strategies: Suppression or Eradication of Glossina palpalis gambiensis in the Niayes of Senegal
Source: PLoS Negl Trop Dis. 2010 May 25;4(5):e692. doi: 10.1371/journal.pntd.0000692 (PMC2876113; doi:10.1371/journal.pntd.0000692)
Supplement: Table S2 — Probabilities of detecting bottleneck in each population according to microsatellite mutation model. (0.02 MB XLS) [file pntd.0000692.s003.xls]

## Sheet: Feuil1
	Excess				Bonferroni
Pop	IAM	TPM	SMM		IAM	TPM	SMM
Diacsaw-Peul	0.5	0.71484	0.82031		1	1	1
Dakar-Haan	0.00098	0.00146	0.11621		0.0147	0.0219	1
Sebikotan	0.41016	0.84961	0.99023		1	1	1
Pout	0.01221	0.34766	0.93457		0.18315	1	1
Missira	0.17969	0.67383	0.97559		1	1	1
	0.00112714	0.075285	0.897416	0.00422219
